# Supplementary material for: A high-throughput-compatible assay to measure the degradation of endogenous Huntingtin proteins
Source: PubMed Central journal article supplement — Acta Pharmacol Sin. 2016 Jun 6;37(10):1307–14. doi: 10.1038/aps.2016.31 (PMC5057231; doi:10.1038/aps.2016.31), 2016-06-06
Supplement: aps201631x1.pdf [file aps201631x1.pdf]

# Figure S1

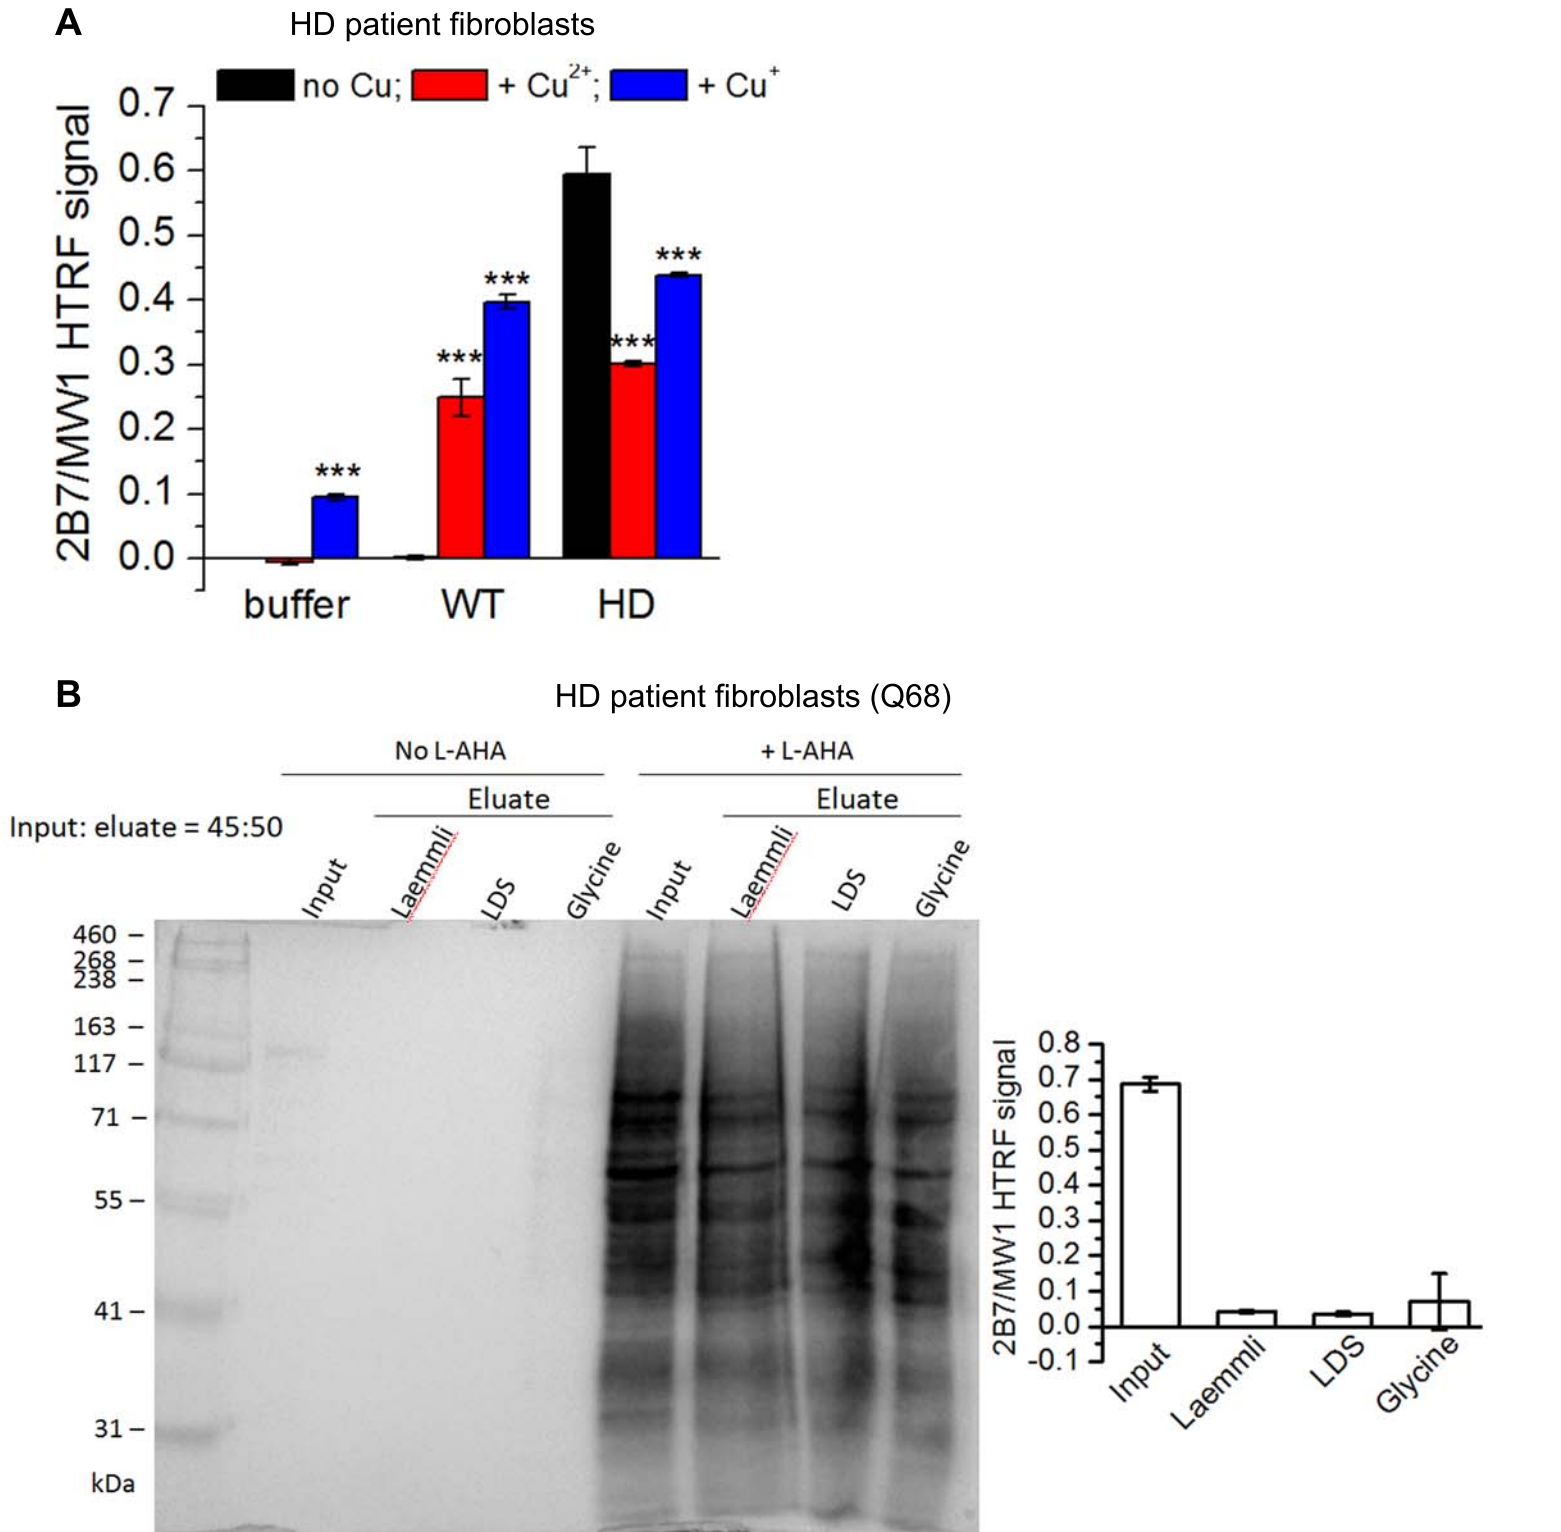

## Figure S1 HTRF is incompatible with CuAAC and elution

(A) In presence or absence of copper ions ( $\text{Cu}^{2+}$  or  $\text{Cu}^+$ ), HTRF signals were measured using the 2B7/MW1 antibody pair, which specifically detects mHTT. Copper ions (red and blue) induce non-specific signals in the buffer alone or wild-type (WT, the lysate from wild-type cells) samples, while reduce the signal of the HD sample (HD, the lysate from Q68 cells).

(B) Left: western-blot with streptavidin-HRP showing that the elution efficiency is high under all the three elution conditions: 1Xlaemmli buffer at 95 °C for 5 minutes (Laemmli), 1X LDS buffer at 70 °C for 10 minutes (LDS). or 100 mM Glycine at pH = 2 for 10 minutes (Glycine). Right: HTRF results showing that all the elution conditions abolish most of the HTRF signals.
